# Supplementary material
Source: PubMed Central journal article supplement (PMC3072623)
Supplement: mmc1.pdf [file mmc1.pdf]

# Models with Energy Penalty on Interresidue Rotation Address Insufficiencies of Conventional Elastic Network Models

Lee-Wei Yang

## Supporting Material

**Table S1.** Correlation of B-factors and predictions by simple EN models for a set of 30 protein structures of ultra-high resolutions

| PDB ID      | Length | Corr <sup>I</sup> <sub>GNM</sub> | Corr <sup>I</sup> <sub>EPIRM</sub> | Corr <sup>I</sup> <sub>ANM</sub> | Corr <sup>A</sup> <sub>EPIRM</sub> | Corr <sup>A</sup> <sub>ANM</sub> |
|-------------|--------|----------------------------------|------------------------------------|----------------------------------|------------------------------------|----------------------------------|
| 1a6m        | 151    | 0.653                            | 0.656                              | 0.664                            | 0.488                              | 0.552                            |
| 1f9y        | 158    | 0.716                            | 0.714                              | 0.645                            | 0.545                              | 0.426                            |
| 1g66        | 207    | 0.541                            | 0.543                              | 0.548                            | 0.429                              | 0.48                             |
| 1g6x        | 58     | 0.789                            | 0.783                              | 0.758                            | 0.644                              | 0.686                            |
| 1gdn        | 227    | 0.593                            | 0.595                              | 0.585                            | 0.438                              | 0.464                            |
| 1i1w        | 303    | 0.641                            | 0.650                              | 0.651                            | 0.489                              | 0.559                            |
| 1i1x        | 302    | 0.806                            | 0.811                              | 0.803                            | 0.607                              | 0.667                            |
| 1k6u        | 58     | 0.826                            | 0.823                              | 0.780                            | 0.628                              | 0.664                            |
| 1kms        | 184    | 0.436                            | 0.435                              | 0.416                            | 0.359                              | 0.349                            |
| 1kmv        | 185    | 0.437                            | 0.437                              | 0.419                            | 0.345                              | 0.384                            |
| 1kt5        | 175    | 0.639                            | 0.697                              | 0.647                            | 0.614                              | 0.558                            |
| 1lok        | 291    | 0.609                            | 0.606                              | 0.573                            | 0.528                              | 0.525                            |
| 1lug        | 259    | 0.732                            | 0.729                              | 0.660                            | 0.56                               | 0.554                            |
| 1m1q        | 90     | 0.685                            | 0.689                              | 0.649                            | 0.423                              | 0.401                            |
| 1m40        | 263    | 0.636                            | 0.635                              | 0.590                            | 0.477                              | 0.475                            |
| 1me3        | 215    | 0.651                            | 0.649                              | 0.587                            | 0.481                              | 0.472                            |
| 1me4        | 215    | 0.657                            | 0.654                              | 0.594                            | 0.514                              | 0.491                            |
| 1nwz        | 125    | 0.431                            | 0.430                              | 0.475                            | 0.364                              | 0.425                            |
| 1nym        | 263    | 0.661                            | 0.663                              | 0.613                            | 0.445                              | 0.506                            |
| 1oc7        | 364    | 0.786                            | 0.784                              | 0.751                            | 0.747                              | 0.689                            |
| 1oq5        | 256    | 0.728                            | 0.724                              | 0.681                            | 0.538                              | 0.542                            |
| 1pwm        | 316    | 0.658                            | 0.661                              | 0.563                            | 0.527                              | 0.464                            |
| 1q0n        | 158    | 0.587                            | 0.583                              | 0.551                            | 0.447                              | 0.444                            |
| 1q2q        | 359    | 0.567                            | 0.570                              | 0.584                            | 0.476                              | 0.563                            |
| 1rtq        | 291    | 0.701                            | 0.700                              | 0.698                            | 0.556                              | 0.591                            |
| 1swz        | 164    | 0.564                            | 0.561                              | 0.592                            | 0.445                              | 0.564                            |
| 1sx7        | 164    | 0.578                            | 0.579                              | 0.621                            | 0.456                              | 0.585                            |
| 1z8a        | 315    | 0.624                            | 0.628                              | 0.570                            | 0.524                              | 0.495                            |
| 3lzt        | 129    | 0.733                            | 0.734                              | 0.604                            | 0.545                              | 0.443                            |
| 4lzt        | 129    | 0.639                            | 0.643                              | 0.469                            | 0.489                              | 0.437                            |
| <b>mean</b> |        | <b>0.643±0.019</b>               | <b>0.643±0.019</b>                 | <b>0.610±0.017</b>               | <b>0.504±0.016</b>                 | <b>0.515±0.016</b>               |

The 30 non-homologous high-resolution (< 1Å) proteins are taken from a set reported previously (14). Due to the high resolution, anisotropic displacement parameters (ADPs) are available to all the listed proteins along with their corresponding temperature factors (B-factors). ‘Corr<sup>I</sup>’ is the correlation between ENM predictions and B-factors, and ‘Corr<sup>A</sup>’ is the correlation between these predictions and ADPs. Note that GNM is an isotropic model and

therefore provides no ‘Corr<sup>A</sup>’ results. Paired student’s t-tests reveal superior performance of GNM and EPIRM in predicting B-factors to that of ANM (see the average Corr<sup>I</sup> values). Yet, the data suggest that EPRIM and ANM describe ADPs equally well (per the statistically identical Corr<sup>A</sup> averages). Means and standard errors are listed in the bottom of the table. Here, 15Å cutoff distance is taken for all the 3 ENMs to maintain an equal sparsity in Hessians.

**Table S2.** Correlation of C<sub>α</sub> distributions and predictions by EPIRM and ANM for a set of 64 NMR-determined structural ensembles

| <b>PDB ID</b> | <b>Length</b> | <b>Corr<sup>I</sup><sub>EPIRM</sub></b> | <b>Corr<sup>I</sup><sub>ANM</sub></b> | <b>Corr<sup>A</sup><sub>EPIRM</sub></b> | <b>Corr<sup>A</sup><sub>ANM</sub></b> |
|---------------|---------------|-----------------------------------------|---------------------------------------|-----------------------------------------|---------------------------------------|
| <b>1a63</b>   | 130           | 0.865                                   | 0.869                                 | 0.763                                   | 0.789                                 |
| <b>1a67</b>   | 108           | 0.554                                   | 0.505                                 | 0.497                                   | 0.478                                 |
| <b>1ah2</b>   | 269           | 0.769                                   | 0.761                                 | 0.675                                   | 0.702                                 |
| <b>1ao8</b>   | 163           | 0.683                                   | 0.730                                 | 0.596                                   | 0.673                                 |
| <b>1ax3</b>   | 162           | 0.899                                   | 0.737                                 | 0.872                                   | 0.693                                 |
| <b>1ayk</b>   | 169           | 0.815                                   | 0.769                                 | 0.750                                   | 0.686                                 |
| <b>1b6f</b>   | 159           | 0.846                                   | 0.947                                 | 0.791                                   | 0.909                                 |
| <b>1b8q</b>   | 134           | 0.832                                   | 0.659                                 | 0.717                                   | 0.577                                 |
| <b>1bip</b>   | 122           | 0.898                                   | 0.841                                 | 0.838                                   | 0.760                                 |
| <b>1bsh</b>   | 138           | 0.760                                   | 0.866                                 | 0.496                                   | 0.846                                 |
| <b>1bvm</b>   | 123           | 0.532                                   | 0.434                                 | 0.444                                   | 0.391                                 |
| <b>1byn</b>   | 128           | 0.616                                   | 0.521                                 | 0.562                                   | 0.488                                 |
| <b>1clh</b>   | 166           | 0.722                                   | 0.748                                 | 0.666                                   | 0.705                                 |
| <b>1cur</b>   | 155           | 0.576                                   | 0.598                                 | 0.517                                   | 0.541                                 |
| <b>1cye</b>   | 129           | 0.740                                   | 0.477                                 | 0.679                                   | 0.448                                 |
| <b>1df3</b>   | 162           | 0.561                                   | 0.409                                 | 0.522                                   | 0.383                                 |
| <b>1e1g</b>   | 104           | 0.849                                   | 0.792                                 | 0.656                                   | 0.737                                 |
| <b>1e8l</b>   | 129           | 0.502                                   | 0.534                                 | 0.397                                   | 0.480                                 |
| <b>1eky</b>   | 129           | 0.686                                   | 0.680                                 | 0.581                                   | 0.633                                 |
| <b>1eq0</b>   | 158           | 0.686                                   | 0.868                                 | 0.588                                   | 0.819                                 |
| <b>1ezo</b>   | 370           | 0.747                                   | 0.696                                 | 0.451                                   | 0.579                                 |
| <b>1fhb</b>   | 108           | 0.805                                   | 0.537                                 | 0.640                                   | 0.465                                 |
| <b>1fhs</b>   | 112           | 0.820                                   | 0.778                                 | 0.681                                   | 0.685                                 |
| <b>1fr0</b>   | 125           | 0.868                                   | 0.954                                 | 0.810                                   | 0.827                                 |
| <b>1g9e</b>   | 117           | 0.713                                   | 0.635                                 | 0.607                                   | 0.632                                 |
| <b>1gd5</b>   | 130           | 0.716                                   | 0.793                                 | 0.663                                   | 0.749                                 |
| <b>1gio</b>   | 125           | 0.830                                   | 0.905                                 | 0.766                                   | 0.824                                 |
| <b>1go0</b>   | 102           | 0.871                                   | 0.882                                 | 0.837                                   | 0.823                                 |
| <b>1i4v</b>   | 230           | 0.940                                   | 0.841                                 | 0.911                                   | 0.801                                 |
| <b>1iku</b>   | 188           | 0.738                                   | 0.785                                 | 0.629                                   | 0.735                                 |
| <b>1inz</b>   | 148           | 0.931                                   | 0.916                                 | 0.902                                   | 0.742                                 |
| <b>1ivt</b>   | 122           | 0.675                                   | 0.687                                 | 0.617                                   | 0.626                                 |
| <b>1j1h</b>   | 123           | 0.776                                   | 0.842                                 | 0.701                                   | 0.734                                 |
| <b>1k19</b>   | 112           | 0.733                                   | 0.458                                 | 0.678                                   | 0.427                                 |
| <b>1klv</b>   | 100           | 0.858                                   | 0.932                                 | 0.821                                   | 0.891                                 |
| <b>1ktm</b>   | 139           | 0.902                                   | 0.749                                 | 0.783                                   | 0.657                                 |
| <b>1l3g</b>   | 123           | 0.943                                   | 0.784                                 | 0.907                                   | 0.763                                 |

|             |     |       |       |       |       |
|-------------|-----|-------|-------|-------|-------|
| <b>1ls4</b> | 164 | 0.719 | 0.885 | 0.645 | 0.815 |
| <b>1m0v</b> | 137 | 0.751 | 0.757 | 0.677 | 0.699 |
| <b>1mm4</b> | 170 | 0.859 | 0.923 | 0.808 | 0.822 |
| <b>1mph</b> | 106 | 0.619 | 0.737 | 0.570 | 0.659 |
| <b>1mvg</b> | 125 | 0.712 | 0.240 | 0.597 | 0.325 |
| <b>1nmv</b> | 163 | 0.851 | 0.789 | 0.781 | 0.667 |
| <b>1orm</b> | 148 | 0.775 | 0.822 | 0.528 | 0.707 |
| <b>1qce</b> | 369 | 0.426 | 0.769 | 0.263 | 0.761 |
| <b>1qn0</b> | 112 | 0.529 | 0.761 | 0.485 | 0.635 |
| <b>1qnd</b> | 123 | 0.825 | 0.802 | 0.772 | 0.727 |
| <b>1qtt</b> | 117 | 0.837 | 0.948 | 0.764 | 0.757 |
| <b>1r3b</b> | 202 | 0.733 | 0.886 | 0.602 | 0.651 |
| <b>1rch</b> | 155 | 0.670 | 0.755 | 0.575 | 0.659 |
| <b>1rck</b> | 106 | 0.710 | 0.679 | 0.640 | 0.624 |
| <b>1ry4</b> | 128 | 0.933 | 0.926 | 0.814 | 0.851 |
| <b>1sjg</b> | 112 | 0.424 | 0.438 | 0.365 | 0.388 |
| <b>1soy</b> | 106 | 0.532 | 0.690 | 0.420 | 0.624 |
| <b>1svq</b> | 94  | 0.647 | 0.498 | 0.579 | 0.474 |
| <b>1t3v</b> | 124 | 0.938 | 0.614 | 0.886 | 0.445 |
| <b>1tr4</b> | 226 | 0.507 | 0.635 | 0.398 | 0.559 |
| <b>1vre</b> | 147 | 0.519 | 0.605 | 0.403 | 0.541 |
| <b>1xo4</b> | 103 | 0.880 | 0.821 | 0.813 | 0.712 |
| <b>1xpw</b> | 143 | 0.750 | 0.850 | 0.699 | 0.769 |
| <b>1y8b</b> | 723 | 0.478 | 0.542 | 0.406 | 0.476 |
| <b>2prf</b> | 125 | 0.647 | 0.603 | 0.533 | 0.533 |
| <b>3msp</b> | 252 | 0.896 | 0.908 | 0.473 | 0.740 |
| <b>3phy</b> | 125 | 0.751 | 0.821 | 0.655 | 0.725 |

**mean**            0.737±0.017 0.728±0.020 0.643±0.019 0.657±0.018

The size of  $C_\alpha$  distribution in a given NMR ensemble is manifested by its inter-conformer r.m.s.d. such that  $\mathbf{rmsd}_i$

$$= \sqrt{\sum_{k=1}^m (\mathbf{r}_{i,k} - \bar{\mathbf{r}}_i)^2 / m} \quad \text{where} \quad \bar{\mathbf{r}}_i = \sum_{k=1}^m \mathbf{r}_{i,k} / m$$

that is the average position of the  $i$ -th  $C_\alpha$  over  $m$  models, and  $\mathbf{r}_{i,k}$  is

the position vector of the  $i$ -th  $C_\alpha$  residue in the  $k$ th conformer. Note that  $\mathbf{rmsd}_i$  is a 3-d vector containing x-, y- and z-components. Before applying the above calculations, all the conformers are iteratively best-aligned against their mean position until it converges (8).  $\mathbf{Corr}^I$  is the correlation between  $|\mathbf{rmsd}_i|$  ( $i=1..N$ ) and the fluctuation magnitude predicted for all the  $N$   $C_\alpha$ s by EPIRM and ANM ( $N$  is the length of the protein). On the other hand,  $\mathbf{Corr}^A$  is the correlation between  $\mathbf{rmsd}_i$  ( $i=1..N$ ) and the fluctuation magnitude predicted for each x-, y- and z-components of all the  $N$   $C_\alpha$ s. Means and standard errors are listed in the last row of the table. Paired student's t-tests reveal  $\mathbf{Corr}^I_{\text{EPIRM}} = \mathbf{Corr}^I_{\text{ANM}} > \mathbf{Corr}^A_{\text{EPIRM}} = \mathbf{Corr}^A_{\text{ANM}}$  using a standard 5% threshold. The 64 non-homologous NMR ensembles are taken from our previous study (27) where we show that GNM gives a correlation of  $0.746 \pm 0.017$  ( $\mathbf{Corr}^I_{\text{GNM}}$ ) over the same set. Here, the ENM calculations are performed on the first conformer deposited in each ensemble.

Although different conformer can as well be used, our former study demonstrated this does not alter the results statistically (27).

**Table S3. Correlations between dominant modes and open↔closed transitions in the three ENMs, when either ‘open’ or ‘closed’ structures are used as the input.**

| Protein               | Open/Closed | EPIRM                             | ANM                               | eGNM                              |
|-----------------------|-------------|-----------------------------------|-----------------------------------|-----------------------------------|
|                       |             | $\alpha^o/\alpha^c (k_o^*/k_c^*)$ | $\alpha^o/\alpha^c (k_o^*/k_c^*)$ | $\alpha^o/\alpha^c (k_o^*/k_c^*)$ |
| Calmodulin            | 1c1l/1ctr   | 0.56/0.44 (1/1)                   | 0.48/0.39 (6/3)                   | 0.46/0.38 (1/1)                   |
| Diphtheria toxin      | 1ddt/1mdt   | 0.65/0.51 (1/4)                   | 0.48/0.35 (1/5)                   | 0.52/0.46 (1/4)                   |
| LAO binding           | 2lao/1lst   | 0.46/0.47 (1/15)                  | 0.76/0.56 (1/4)                   | 0.40/0.45 (6/15)                  |
| Enolase               | 3enl/7enl   | 0.38/0.30 (1/1)                   | 0.31/0.25 (1/2)                   | 0.28/0.27 (1/1)                   |
| Adenylate Kinase      | 4akeB/1e4vA | 0.71/0.43 (1/1)                   | 0.79/0.54 (1/1)                   | 0.59/0.40 (1/1)                   |
| Thymidylate synthase  | 3tms/2tsc   | 0.48/0.46 (1/2)                   | 0.44/0.22 (6/8)                   | 0.43/0.46 (1/2)                   |
| DHFR                  | 5dfr/4dfr   | 0.45/0.40 (1/1)                   | 0.62/0.66 (1/1)                   | 0.32/0.37 (1/12)                  |
| Citrate synthase      | 5csc/6csc   | 0.75/0.50 (1/1)                   | 0.89/0.39 (3/5)                   | 0.71/0.50 (1/1)                   |
| Yhdh                  | 1o89A/1o8cB | 0.62/0.53 (1/1)                   | 0.46/0.41(3/1)                    | 0.40/0.34 (1/1)                   |
| Actin-Related Protein | 1k8k/1tyq   | 0.64/0.67 (1/1)                   | 0.73/0.56 (2/6)                   | 0.52/0.60 (1/1)                   |
| <b>Average</b>        |             | <b>0.57/0.47(1.0/2.8)</b>         | <b>0.60/0.43(2.5/3.6)</b>         | <b>0.46/0.42(1.5/3.9)</b>         |

PDB structures used for open/closed conformation are listed in the second column. In three examined ENMs (column 3-5),  $k_o^*$  is the internal mode that has the highest correlation (indicated by  $\alpha^o$ ) with observed open↔closed transitions when ‘open (unbound)’ structures are used as the ENM input, whereas  $k_c^*$  is the mode that produces the highest correlation  $\alpha^c$  with the observed conformational changes when ‘closed (inhibitor-bound)’ structures are used as the input. For instance, the conformational transition for Calmodulin from ‘open’ (1c1l) to ‘closed’ (1ctr) state can be best described by the 6th ANM mode with a 0.48 correlation when the ‘open’ structure is used, or by the 3rd ANM mode with a 0.39 correlation when the ‘closed’ structure is used. Here the paired student T-test is used to examine the statistical equivalence or disparity between ENM groups. As ‘open’ conformation is used as the input, EPIRM and ANM have statistically identical averages (0.57 and 0.60 respectively) while outperforming eGNM that has an average of 0.46. When ‘closed’ conformation is used as the input, the three ENMs have statistically equivalent performances despite the higher mean value of EPIRM (0.47).

## I. Detailed derivations of the eGNM Hessian, $\Gamma \otimes \mathbf{I}$ matrix, from the GNM potential

The GNM energy  $E_{GNM}$  takes the form

$$E_{GNM} = \sum_{i,j=1}^N \frac{\gamma}{2} (\vec{\mathbf{r}}_{ij} - \vec{\mathbf{r}}_{ij}^0) \bullet (\vec{\mathbf{r}}_{ij} - \vec{\mathbf{r}}_{ij}^0) H(R_c - |\vec{\mathbf{r}}_{ij}^0|) \quad (\text{SI-1})$$

Here  $\vec{\mathbf{r}}_{ij}$  and  $\vec{\mathbf{r}}_{ij}^0$  are the positional vectors pointing from the  $C_\alpha$  atom  $i$  to the  $C_\alpha$  atom  $j$  at an instantaneous moment and at the equilibrium state (readily obtained from solved X-ray or NMR structures) respectively. The Heaviside step function in the end of right-hand side ensures the values are non-vanishing only when the equilibrium departure of atom pairs is within a cutoff distance  $R_c$ . The difference of vectors  $\vec{\mathbf{r}}_{ij}$  and  $\vec{\mathbf{r}}_{ij}^0$  can be expressed as the difference between vectors  $\Delta\vec{\mathbf{r}}_j$  and  $\Delta\vec{\mathbf{r}}_i$ , the deviation of atom  $i$  and  $j$  from their mean values, such that

$$E_{GNM} = \sum_{i,j=1}^N \frac{\gamma}{2} (\Delta\vec{\mathbf{r}}_j - \Delta\vec{\mathbf{r}}_i) \bullet (\Delta\vec{\mathbf{r}}_j - \Delta\vec{\mathbf{r}}_i) H(R_c - |\vec{\mathbf{r}}_{ij}^0|) \quad (\text{SI-2})$$

A schematic illustration for the relation of these vectors can be found in Figure S1. The matrix-vector form of the same expression reads as

$$\begin{aligned} E_{GNM} &= \frac{\gamma}{2} \Delta\mathbf{R}^T (\Gamma \otimes \mathbf{I}) \Delta\mathbf{R} \\ &= \frac{\gamma}{2} (\Delta\mathbf{X}^T \Gamma \Delta\mathbf{X} + \Delta\mathbf{Y}^T \Gamma \Delta\mathbf{Y} + \Delta\mathbf{Z}^T \Gamma \Delta\mathbf{Z}) \end{aligned} \quad (\text{SI-3})$$

$\Delta\mathbf{R}$  is a  $3N$ -d column vector and  $\Delta\mathbf{X}, \Delta\mathbf{Y}$  and  $\Delta\mathbf{Z}$  are column vectors of  $N$  dimension. where  $\Delta\mathbf{R}^T = (\Delta x_1, \Delta y_1, \Delta z_1, \Delta x_2, \Delta y_2, \Delta z_2, \dots, \Delta x_N, \Delta y_N, \Delta z_N)$

$$\Delta\mathbf{X}^T = (\Delta x_1, \Delta x_2 \dots \Delta x_N); \quad \Delta\mathbf{Y}^T = (\Delta y_1, \Delta y_2 \dots \Delta y_N); \quad \Delta\mathbf{Z}^T = (\Delta z_1, \Delta z_2 \dots \Delta z_N);$$

$\Delta\alpha_i$  is the positional deviation from the mean for node  $i$  at a instant moment;  $\alpha$  is the Cartesian coordinate of x-, y- or z- of the node  $i$ .

$\Gamma$  is a  $N \times N$  connectivity matrix, of which the off-diagonal elements  $\Gamma_{ij} = -1$  if  $i$  is in contact with  $j$  within a cutoff distance and zero otherwise. The diagonal elements  $\Gamma_{ii} = -\sum_{j=1, j \neq i}^N \Gamma_{ij}$ ;  $\Gamma \otimes \mathbf{I}$  is a

$3N \times 3N$  matrix comprises  $N \times N$  super-elements, each of which is a  $3 \times 3$  matrix for pair  $ij$  and the super-element  $ij$  takes values  $\Gamma_{ij} \mathbf{I}$  where  $\mathbf{I}$  is a  $3 \times 3$  identity matrix.  $\Gamma \otimes \mathbf{I}$  is the Hessian for GNM potential. The elements in  $\Gamma \otimes \mathbf{I}$  are the second derivatives of the  $E_{GNM}$ . The proof of which is shown in the Supplementary II.

The derivation of the section starts from the definition of *ensemble average* (or expectation value) of a certain physical quantity represented as a random variable; the *probability* associated with each instantaneous value of such quantity can be defined by the *potential* of the system at the

value through Boltzmann relation. The potential featured in GNM here is a simple, residue-based, pairwise potential.

For an instantaneous conformation, its probability assumes the Boltzmann relation such that

$$\begin{aligned}
\Pr(\Delta \mathbf{R}) &= \exp(-E_{GNM}(\Delta \mathbf{R})/k_B T) \\
&= \exp\left(-\frac{\gamma}{2} (\Delta \mathbf{X}^T \Gamma \Delta \mathbf{X} + \Delta \mathbf{Y}^T \Gamma \Delta \mathbf{Y} + \Delta \mathbf{Z}^T \Gamma \Delta \mathbf{Z}) / k_B T\right) \\
&= \exp\left(-\frac{\gamma}{2k_B T} \Delta \mathbf{X}^T \Gamma \Delta \mathbf{X}\right) \exp\left(-\frac{\gamma}{2k_B T} \Delta \mathbf{Y}^T \Gamma \Delta \mathbf{Y}\right) \exp\left(-\frac{\gamma}{2k_B T} \Delta \mathbf{Z}^T \Gamma \Delta \mathbf{Z}\right) \\
&= \Pr(\Delta \mathbf{X}) \Pr(\Delta \mathbf{Y}) \Pr(\Delta \mathbf{Z}) \tag{SI-4}
\end{aligned}$$

Let us consider a  $N \times N$  residue-residue (or node-node) correlation matrix  $\mathbf{C}$ , of which the component  $C_{ij}$  is  $\Delta \vec{\mathbf{r}}_i \bullet \Delta \vec{\mathbf{r}}_j$ . It is clear that

$$\langle \mathbf{C} \rangle = \langle \Delta \mathbf{X}^T \Delta \mathbf{X} \rangle + \langle \Delta \mathbf{Y}^T \Delta \mathbf{Y} \rangle + \langle \Delta \mathbf{Z}^T \Delta \mathbf{Z} \rangle \tag{SI-5}$$

$$\langle \mathbf{C} \rangle = \frac{\int \mathbf{C} \Pr(\Delta \mathbf{R}) d \Delta \mathbf{R}}{\int \Pr(\Delta \mathbf{R}) d \Delta \mathbf{R}} \tag{SI-6}$$

$$\begin{aligned}
\langle \Delta \mathbf{X}^T \Delta \mathbf{X} \rangle &= \frac{\int \Delta \mathbf{X}^T \Delta \mathbf{X} \Pr(\Delta \mathbf{R}) d \Delta \mathbf{R}}{\int \Pr(\Delta \mathbf{R}) d \Delta \mathbf{R}} = \frac{\int \Delta \mathbf{X}^T \Delta \mathbf{X} \Pr(\Delta \mathbf{X}) \Pr(\Delta \mathbf{Y}) \Pr(\Delta \mathbf{Z}) d \Delta \mathbf{X} d \Delta \mathbf{Y} d \Delta \mathbf{Z}}{\int \Pr(\Delta \mathbf{X}) \Pr(\Delta \mathbf{Y}) \Pr(\Delta \mathbf{Z}) d \Delta \mathbf{X} d \Delta \mathbf{Y} d \Delta \mathbf{Z}} = \\
&= \frac{\int_{-\infty}^{\infty} \Delta \mathbf{X}^T \Delta \mathbf{X} \exp\left(-\frac{\gamma}{2k_B T} \Delta \mathbf{X}^T \Gamma \Delta \mathbf{X}\right) d \Delta \mathbf{X} \int_{-\infty}^{\infty} \exp\left(-\frac{\gamma}{2k_B T} \Delta \mathbf{Y}^T \Gamma \Delta \mathbf{Y}\right) d \Delta \mathbf{Y} \int_{-\infty}^{\infty} \exp\left(-\frac{\gamma}{2k_B T} \Delta \mathbf{Z}^T \Gamma \Delta \mathbf{Z}\right) d \Delta \mathbf{Z}}{\int_{-\infty}^{\infty} \exp\left(-\frac{\gamma}{2k_B T} \Delta \mathbf{X}^T \Gamma \Delta \mathbf{X}\right) d \Delta \mathbf{X} \int_{-\infty}^{\infty} \exp\left(-\frac{\gamma}{2k_B T} \Delta \mathbf{Y}^T \Gamma \Delta \mathbf{Y}\right) d \Delta \mathbf{Y} \int_{-\infty}^{\infty} \exp\left(-\frac{\gamma}{2k_B T} \Delta \mathbf{Z}^T \Gamma \Delta \mathbf{Z}\right) d \Delta \mathbf{Z}} \\
&= \frac{\int_{-\infty}^{\infty} \Delta \mathbf{X} \Delta \mathbf{X}^T \exp\left(-\frac{\gamma}{2k_B T} \Delta \mathbf{X}^T \Gamma \Delta \mathbf{X}\right) d \Delta \mathbf{X}}{\int_{-\infty}^{\infty} \exp\left(-\frac{\gamma}{2k_B T} \Delta \mathbf{X}^T \Gamma \Delta \mathbf{X}\right) d \Delta \mathbf{X}} \tag{SI-7}
\end{aligned}$$

The Gaussian integrals in the denominator and the integral in the numerator can be solved using

the equalities  $\int_{-\infty}^{\infty} e^{-ax^2} dx = \sqrt{\frac{\pi}{a}}$  and  $\int_{-\infty}^{\infty} x^2 e^{-ax^2} dx = \frac{\sqrt{\pi}}{2} a^{-3/2}$ , we therefore obtain

$$\langle \Delta \mathbf{X} \Delta \mathbf{X}^T \rangle = \frac{k_B T}{\gamma} \Gamma^{-1}; \text{ Similarly, } \langle \Delta \mathbf{Y} \Delta \mathbf{Y}^T \rangle = \frac{k_B T}{\gamma} \Gamma^{-1} \text{ and } \langle \Delta \mathbf{Z} \Delta \mathbf{Z}^T \rangle = \frac{k_B T}{\gamma} \Gamma^{-1}, \text{ and}$$

$$\langle \mathbf{C} \rangle = \langle \Delta \mathbf{X}^T \Delta \mathbf{X} \rangle + \langle \Delta \mathbf{Y}^T \Delta \mathbf{Y} \rangle + \langle \Delta \mathbf{Z}^T \Delta \mathbf{Z} \rangle = \frac{3k_B T}{\gamma} \Gamma^{-1} \tag{SI-8}$$

Note that here the imposed condition  $\langle \Delta \mathbf{X} \Delta \mathbf{X}^T \rangle = \langle \Delta \mathbf{Y} \Delta \mathbf{Y}^T \rangle = \langle \Delta \mathbf{Z} \Delta \mathbf{Z}^T \rangle$  is not an assumption if GNM potential is so assumed in the Eq.SI-1. However, in Flory's treatment, polymer chain is assumed Gaussian in the first place (10).

Also, since  $E_{GNM} = \frac{\gamma}{2} \Delta \mathbf{R}^T (\boldsymbol{\Gamma} \otimes \mathbf{I}) \Delta \mathbf{R}$ , it can be shown in a similar way that

$$\Pr(\Delta \mathbf{R}) = \exp\left(-\frac{\gamma}{2k_B T} \Delta \mathbf{R}^T (\boldsymbol{\Gamma} \otimes \mathbf{I}) \Delta \mathbf{R}\right) \quad (\text{SI-9})$$

$$\langle \Delta \mathbf{R}^T \Delta \mathbf{R} \rangle = \frac{\int \Delta \mathbf{R}^T \Delta \mathbf{R} \Pr(\Delta \mathbf{R}) d \Delta \mathbf{R}}{\int \Pr(\Delta \mathbf{R}) d \Delta \mathbf{R}} = \frac{k_B T}{\gamma} (\boldsymbol{\Gamma} \otimes \mathbf{I})^{-1} \quad (\text{SI-10})$$

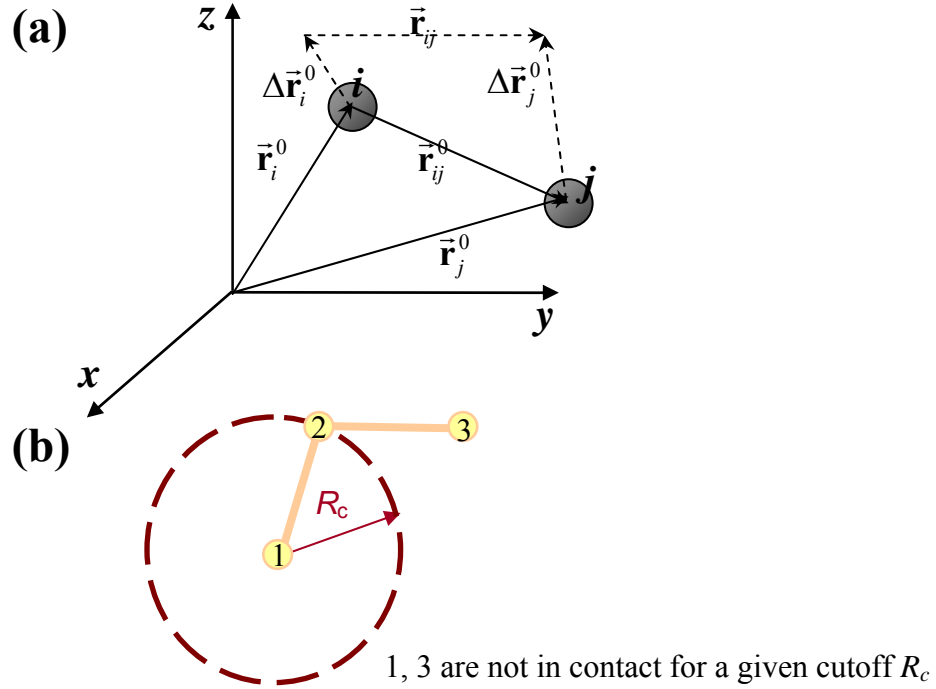

$$\begin{aligned}
 E_{\text{GNM}} &= \gamma/2 (\Delta \vec{r}_{12}^2 + \Delta \vec{r}_{23}^2) \\
 &= \gamma/2 [(\Delta \vec{r}_2 - \Delta \vec{r}_1)^2 + (\Delta \vec{r}_3 - \Delta \vec{r}_2)^2] \\
 &= \gamma/2 \underbrace{[\Delta \vec{r}_1 \Delta \vec{r}_2 \Delta \vec{r}_3]}_{\text{the connectivity matrix, } \Gamma} \left( \begin{bmatrix} 1 & -1 & 0 \\ -1 & 2 & -1 \\ 0 & -1 & 1 \end{bmatrix} \otimes \begin{bmatrix} 1 & 0 & 0 \\ 0 & 1 & 0 \\ 0 & 0 & 1 \end{bmatrix} \right) \begin{bmatrix} \Delta \vec{r}_1 \\ \Delta \vec{r}_2 \\ \Delta \vec{r}_3 \end{bmatrix}
 \end{aligned}$$

**Figure S1 (a)** The relative orientations of vectors  $\vec{r}_{ij}^0$ ,  $\vec{r}_i^0$ ,  $\vec{r}_j^0$ ,  $\Delta \vec{r}_j$  and  $\Delta \vec{r}_i$  **(b)** The elastic potential of a tri-peptide molecule, represented by  $C_\alpha$  atoms only. The cutoff  $R_c$  here is set small enough for the atom pairs 1-2 and 2-3 in contact but not for 1-3. Provided a certain pair  $ij$  ( $i \neq j$ ) is in contact (their linear separation  $< R_c$ ), the off-diagonal element  $ij$  of the connectivity matrix  $\Gamma$  is set to be -1; otherwise 0. The diagonal elements are the negative sums of the off-diagonal elements in each individual row (or column; since  $\Gamma$  is symmetric). Here  $[\Delta \vec{r}_1 \Delta \vec{r}_2 \Delta \vec{r}_3] = [\Delta x_1 \Delta y_1 \Delta z_1 \Delta x_2 \Delta y_2 \Delta z_2 \Delta x_3 \Delta y_3 \Delta z_3]$



## II To derive the eGNM Hessian, $\Gamma \otimes \mathbf{I}$ matrix, from GNM potential

$$\begin{aligned}
 E_{GNM} &= \sum_{i,j=1}^N \frac{\gamma}{2} (\Delta \bar{\mathbf{r}}_j - \Delta \bar{\mathbf{r}}_i) \bullet (\Delta \bar{\mathbf{r}}_j - \Delta \bar{\mathbf{r}}_i) H(R_c - |\bar{\mathbf{r}}_{ij}^0|) \\
 &= \sum_{i,j=1}^N \frac{\gamma}{2} [(\Delta x_j - \Delta x_i)^2 + (\Delta y_j - \Delta y_i)^2 + (\Delta z_j - \Delta z_i)^2] H(R_c - |\bar{\mathbf{r}}_{ij}^0|) \quad (\text{SI-11})
 \end{aligned}$$

For those  $j$  that contact with  $i$ ,

$$\frac{\partial E}{\partial \Delta x_i} = -\gamma \sum_{j=1}^N (\Delta x_j - \Delta x_i); \quad \frac{\partial^2 E}{\partial \Delta x_i^2} = \gamma \sum_{j=1}^N = \mathcal{m}_i = \frac{\partial^2 E}{\partial \Delta y_i^2} = \frac{\partial^2 E}{\partial \Delta z_i^2}; \quad n_i \text{ is the number of neighbors of } i \text{ within a given contact distance } R_c.$$

$$\frac{\partial^2 E}{\partial \Delta x_i \partial \Delta y_i} = 0; \quad \frac{\partial^2 E}{\partial \Delta x_i \partial \Delta z_i} = 0;$$

Hence, the diagonal superelement  $ii$  in  $\Gamma \otimes \mathbf{I}$  comes with the form

$$\begin{bmatrix} \mathcal{m}_i & 0 & 0 \\ 0 & \mathcal{m}_i & 0 \\ 0 & 0 & \mathcal{m}_i \end{bmatrix}$$

For off-diagonal superelement  $ij$  in  $\Gamma \otimes \mathbf{I}$ ,

$$\frac{\partial^2 E}{\partial \Delta x_i \partial \Delta x_j} = -\gamma; \quad \frac{\partial^2 E}{\partial \Delta x_i \partial \Delta y_j} = 0; \quad \frac{\partial^2 E}{\partial \Delta x_i \partial \Delta z_j} = 0,$$

hence of the form

$$\begin{bmatrix} -\gamma & 0 & 0 \\ 0 & -\gamma & 0 \\ 0 & 0 & -\gamma \end{bmatrix}$$

As a result,  $\Gamma \otimes \mathbf{I}$  comprises elements such as

$$\left[ \begin{array}{cccccccccc} \mathcal{m}_1 & 0 & 0 & -\gamma & 0 & 0 & -\gamma & 0 & 0 & 0 \\ 0 & \mathcal{m}_1 & 0 & 0 & -\gamma & 0 & 0 & -\gamma & 0 & 0 & \dots & \dots \\ 0 & 0 & \mathcal{m}_1 & 0 & 0 & -\gamma & 0 & 0 & -\gamma & 0 & & \\ -\gamma & 0 & 0 & \ddots & & & & \vdots & & & & \\ 0 & -\gamma & 0 & & \ddots & & & \vdots & & & & \\ 0 & 0 & -\gamma & & & \ddots & & \vdots & & & & \\ -\gamma & 0 & 0 & & & & \mathcal{m}_i & 0 & 0 & & & \\ 0 & -\gamma & 0 & \dots & \dots & \dots & 0 & \mathcal{m}_i & 0 & & & \\ 0 & 0 & -\gamma & & & & 0 & 0 & \mathcal{m}_i & & & \\ 0 & 0 & 0 & & & & & & & \ddots & & \\ \vdots & & & & & & & & & \ddots & & \\ \vdots & & & & & & & & & \ddots & & \end{array} \right]_{3N \times 3N}$$

The fact that GNM modes contain rigid-body rotation was not widely conceived before. One of the reasons is that it is hard to examine rotation in the  $N$ -dimensional space instead of  $3N$ . eGNM concept provides a correct scaffold and resolves modes in  $3N$ -dimension hence an easier confirmation and characterization of external rotation in modes.

### III Derivation of the Hessian, $\mathbf{H}$ , based on ANM potential

$$E_{ANM} = \sum_{i,j=1}^N \frac{\gamma}{2} (L_{ij} - L_{ij}^0)^2 H(R_c - |L_{ij}^0|) = \frac{\gamma}{2} \Delta \mathbf{R}^T \mathbf{H} \Delta \mathbf{R} \quad (\text{SI-12})$$

where  $L_{ij} = \sqrt{(x_j - x_i)^2 + (y_j - y_i)^2 + (z_j - z_i)^2}$

$$L_{ij}^0 = \sqrt{(x_j^o - x_i^o)^2 + (y_j^o - y_i^o)^2 + (z_j^o - z_i^o)^2}$$

and here

$$x_i = x_i^o + \Delta x_i$$

so that  $L_{ij} = \sqrt{(\Delta x_j - \Delta x_i + x_j^o - x_i^o)^2 + (\Delta y_j - \Delta y_i + y_j^o - y_i^o)^2 + (\Delta z_j - \Delta z_i + z_j^o - z_i^o)^2}$

For those  $j$  that contact with  $i$ , we take the first derivative of  $E_{ANM}$  (thereafter denoted as  $E$ ) against  $\Delta x_i$  to obtain

$$F_i^x = \frac{\partial E}{\partial \Delta x_i} = \gamma \sum_j (L_{ij} - L_{ij}^0) \frac{\partial L_{ij}}{\partial \Delta x_i} = \gamma \sum_j (L_{ij} - L_{ij}^0) \frac{-(\Delta x_j - \Delta x_i + x_j^o - x_i^o)}{L_{ij}} \quad (\text{SI-13})$$

Take the derivative of the above obtained again to obtain the second derivative of  $E$

$$\frac{\partial^2 E}{\partial \Delta x_i^2} = \gamma \sum_{j=1}^N \frac{(\Delta x_j - \Delta x_i + x_j^o - x_i^o)^2}{L_{ij}^2} + (L_{ij} - L_{ij}^0) \frac{1}{L_{ij}} + (L_{ij} - L_{ij}^0) \frac{-(\Delta x_j - \Delta x_i + x_j^o - x_i^o)}{L_{ij}^3}$$

When the second derivative is taken at the equilibrium,  $L_{ij} = L_{ij}^0$ , the above expression is reduced to

$$\left. \frac{\partial^2 E}{\partial \Delta x_i^2} \right|_{\Delta x_i, \Delta y_i, \Delta z_i = 0} = \gamma \sum_{j=1}^N \frac{(x_j^o - x_i^o)^2}{(L_{ij}^0)^2} \quad (\text{SI-14})$$

$$\text{Similarly, } \left. \frac{\partial^2 E}{\partial \Delta y_i^2} \right|_{\Delta x_i, \Delta y_i, \Delta z_i = 0} = \gamma \sum_{j=1}^N \frac{(y_j^o - y_i^o)^2}{(L_{ij}^0)^2} ; \quad \left. \frac{\partial^2 E}{\partial \Delta z_i^2} \right|_{\Delta x_i, \Delta y_i, \Delta z_i = 0} = \gamma \sum_{j=1}^N \frac{(z_j^o - z_i^o)^2}{(L_{ij}^0)^2}$$

$$\text{and } \left. \frac{\partial^2 E}{\partial \Delta x_i \partial \Delta y_i} \right|_{\Delta x_i, \Delta y_i, \Delta z_i = 0} = \gamma \sum_{j=1}^N \frac{(y_j^o - y_i^o)(x_j^o - x_i^o)}{(L_{ij}^0)^2} \quad (\text{SI-15})$$

Similar approach extended when  $i$  is not equal to  $j$ ,

$$\left. \frac{\partial^2 E}{\partial \Delta x_i \partial \Delta x_j} \right|_{\Delta x_i, \Delta y_i, \Delta z_i = 0} = -\gamma \frac{(x_j^o - x_i^o)^2}{(L_{ij}^0)^2} \quad (\text{SI-16})$$

$$\left. \frac{\partial^2 E}{\partial \Delta x_i \partial \Delta y_i} \right|_{\Delta x_i, \Delta y_i, \Delta z_i = 0} = -\gamma \frac{(y_j^o - y_i^o)(x_j^o - x_i^o)}{(L_{ij}^0)^2} \quad (\text{SI-17})$$

The  $3N \times 3N$  Hessian  $\mathbf{H}$  can therefore be constructed. Also, it can be derived similarly as described in the Section I that

$$\langle \Delta \mathbf{R} \Delta \mathbf{R}^T \rangle = \frac{k_B T}{\gamma} \mathbf{H}^{-1}. \quad (\text{SI-18})$$

The diagonalization of Hessian gives six vanishing eigenvalues such that

$$\mathbf{H} = \sum_{k=7}^{3N} \frac{1}{\lambda_k''} \mathbf{V}_k'' \mathbf{V}_k''^T \quad (\text{see also Ref (4)}). \quad (\text{SI-19})$$

#### IV Three trivial modes obtained from diagonalization of Hessian when the model is translational invariant

In Cartesian space, for any model that is translational invariant (such as non-condensed GNM), 3 zero eigen modes are generated in the diagonalization of Hessian, and another 3 zero modes are generated if it is also rotational invariant (such as ENM). A simple explanation is as follows, which justifies why eGNM Hessian,  $\Gamma \otimes \mathbf{I}$ , results in 3 zero eigen modes for the external translation.

Let us consider a one-dimension system along which  $N$  degrees of freedom are located, and the overall energy for this system is  $E(x_1, x_2, \dots, x_N)$  which is a function of positions of all the d.o.f. When the system is translational invariant in energy,

$$E(x_1, x_2, \dots, x_N) = E(x_1+c, x_2+c, \dots, x_N+c) \quad (\text{SI-20})$$

where  $c$  is the amount of displacement by which all the d.o.f systematically translated. The  $E$  is not changed with  $c$  to be translational invariant. The first derivative of  $E$  against  $c$  should therefore be zero. That is

$$\frac{dE}{dc} = 0 = \sum_{j=1}^N \frac{\partial E}{\partial x_j} \frac{dx_j}{dc} \quad (\text{SI-21})$$

We also note that the term  $\frac{dx_j}{dc}$  is unity when the system is in rigid-body translation ( $x_j$  has to change as much as  $c$  does), which leads to  $\sum_{j=1}^N \frac{\partial E}{\partial x_j} = 0$

We take partial derivative against  $x_i$  on both sides of the above expression to obtain

$$\sum_{j=1}^N \frac{\partial E}{\partial x_i \partial x_j} = 0 \quad (\text{SI-22})$$

$\frac{\partial E}{\partial x_i \partial x_j}$  are the Hessian elements in those simple models discussed in the study. According to the derived equality,

$$\mathbf{H} \mathbf{v} = \lambda \mathbf{v} = 0 \quad (\text{SI-23})$$

where  $\mathbf{v}$  is the normalized  $N$ -d column vector for the external translation of the system such that

$$\mathbf{v} = \left[ \frac{1}{\sqrt{N}}, \frac{1}{\sqrt{N}}, \dots, \frac{1}{\sqrt{N}} \right]^T. \quad (\text{SI-24})$$

Hence, it becomes clear that translational invariance exemplified in the one-dimension system results in one zero eigen mode. In the Cartesian space, we therefore obtain three trivial modes due to the translational invariance. The trivial modes that result from the rotational invariance of the potential (such as ANM) can be rationalized in a similar way.

## V Force and Torque experienced in GNM- and ANM-defined Potential

### GNM - Energy function defined by vectorial differences of atomic displacements

According to Eq. SI-1, force acting on atom  $I$  is

$$\mathbf{f}_i = -\frac{\partial E_{GNM}}{\partial \mathbf{r}_i} = \sum_{j \neq i}^N \gamma H(R_c - |\mathbf{r}_{ij}^0|) (\mathbf{r}_{ij} - \mathbf{r}_{ij}^0) \quad (\text{SI-25})$$

where  $\mathbf{f}_i = [f_{x,i} \ f_{y,i} \ f_{z,i}]^T$  and  $\frac{\partial}{\partial \mathbf{r}_i} = [\frac{\partial}{\partial x_i} \ \frac{\partial}{\partial y_i} \ \frac{\partial}{\partial z_i}]^T$

Total force acting on the molecule.

$$\mathbf{F}_{total} = \sum_{i=1}^N \mathbf{f}_i = \sum_{j \neq i}^N \gamma H(R_c - |\mathbf{r}_{ij}^0|) (\mathbf{r}_{ij} - \mathbf{r}_{ij}^0) = \mathbf{0} \quad (\text{SI-26})$$

To derive Eq. SI-26 we use  $\mathbf{r}_{ij} = -\mathbf{r}_{ji}$  and  $\mathbf{r}_{ij}^0 = -\mathbf{r}_{ji}^0$ .

Torque acting on the molecule;

$$\begin{aligned} \boldsymbol{\tau} &= \sum_{i=1}^N \mathbf{r}_i \times \mathbf{f}_i \\ &= \sum_{i=1}^N \mathbf{r}_i \times \sum_{j \neq i}^N \gamma H(R_c - |\mathbf{r}_{ij}^0|) (\mathbf{r}_{ij} - \mathbf{r}_{ij}^0) \\ &= \sum_{i=1}^N \sum_{j=i+1}^N \gamma H(R_c - |\mathbf{r}_{ij}^0|) (\mathbf{r}_i \times (\mathbf{r}_{ij} - \mathbf{r}_{ij}^0) + \mathbf{r}_j \times (\mathbf{r}_{ji} - \mathbf{r}_{ji}^0)) \\ &= \sum_{i=1}^N \sum_{j=i+1}^N \gamma H(R_c - |\mathbf{r}_{ij}^0|) (\mathbf{r}_i \times (\mathbf{r}_{ij} - \mathbf{r}_{ij}^0) - \mathbf{r}_j \times (\mathbf{r}_{ij} - \mathbf{r}_{ij}^0)) \\ &= -\sum_{i=1}^N \sum_{j=i+1}^N \gamma H(R_c - |\mathbf{r}_{ij}^0|) (\mathbf{r}_{ij} \times (\mathbf{r}_{ij} - \mathbf{r}_{ij}^0)) \\ &= -\sum_{i=1}^N \sum_{j=i+1}^N \gamma H(R_c - |\mathbf{r}_{ij}^0|) (\mathbf{r}_{ij}^0 \times \mathbf{r}_{ij}) \\ &= -\sum_{i=1}^N \sum_{j=i+1}^N \gamma H(R_c - |\mathbf{r}_{ij}^0|) (\mathbf{r}_{ij}^0 \times \Delta \mathbf{r}_{ij}) \end{aligned} \quad (\text{SI-27})$$

To derive Eq. SI-27,  $\mathbf{r}_{ij} = -\mathbf{r}_{ji}$ ,  $\mathbf{r}_{ij} \times \mathbf{r}_{ij} = \mathbf{0}$  and  $\Delta \mathbf{r}_{ij} = \mathbf{r}_{ij} - \mathbf{r}_{ij}^0$  are used. We note that  $\boldsymbol{\tau} = \mathbf{0}$  when  $\Delta \mathbf{r}_{ij} \parallel \mathbf{r}_{ij}^0$  for all  $i, j \in |\mathbf{r}_{ij}^0| < R_c$ . Non-vanishing torque acts on the molecule when molecule is subject to a rigid-body rotation. Hence, GNM has translational but not rotational invariance.

ANM - Energy function defined by the difference of inter-atomic distances

We know that ANM potential is the sum of a function  $\phi$  that is a function of  $r_{ij}$  such that

$$E_{ANM} = \sum_{i,j=1,j>i}^N \phi(r_{ij}) \quad (\text{SI-28})$$

where,  $r_{ij} = |\mathbf{r}_{ij}|$ . The force acting on atom  $I$  is

$$\mathbf{f}_i = -\frac{\partial E_{ANM}}{\partial \mathbf{r}_i} = \sum_{j>i}^N \frac{\partial \phi(r_{ij})}{\partial r_{ij}} \frac{\mathbf{r}_{ij}}{r_{ij}} \quad (\text{SI-29})$$

Total force acting on the molecule;

$$\mathbf{F}_{total} = \sum_{i=1}^N \mathbf{f}_i = \sum_{i=1}^N \sum_{j>i}^N \frac{\partial \phi(r_{ij})}{\partial r_{ij}} \frac{\mathbf{r}_{ij}}{r_{ij}} = \mathbf{0} \quad (\text{SI-30})$$

To derive Eq. SI-30, we use  $\mathbf{r}_{ij} = -\mathbf{r}_{ji}$  and  $r_{ij} = r_{ji}$ .

Torque acting on the molecule;

$$\begin{aligned} \boldsymbol{\tau} &= \sum_{i=1}^N \mathbf{r}_i \times \mathbf{f}_i \\ &= \sum_{i=1}^N \mathbf{r}_i \times \sum_{j>i}^N \frac{\partial \phi(r_{ij})}{\partial r_{ij}} \frac{\mathbf{r}_{ij}}{r_{ij}} \\ &= \sum_{i=1}^N \sum_{j=i+1}^N \left( \mathbf{r}_i \times \frac{\partial \phi(r_{ij})}{\partial r_{ij}} \frac{\mathbf{r}_{ij}}{r_{ij}} + \mathbf{r}_j \times \frac{\partial \phi(r_{ji})}{\partial r_{ji}} \frac{\mathbf{r}_{ji}}{r_{ji}} \right) \\ &= \sum_{i=1}^N \sum_{j=i+1}^N \left( \mathbf{r}_i \times \frac{\partial \phi(r_{ij})}{\partial r_{ij}} \frac{\mathbf{r}_{ij}}{r_{ij}} - \mathbf{r}_j \times \frac{\partial \phi(r_{ij})}{\partial r_{ij}} \frac{\mathbf{r}_{ij}}{r_{ij}} \right) \\ &= -\sum_{i=1}^N \sum_{j=i+1}^N \left( \frac{1}{r_{ij}} \frac{\partial \phi(r_{ij})}{\partial r_{ij}} \mathbf{r}_{ij} \times \mathbf{r}_{ij} \right) = \mathbf{0} \end{aligned} \quad (\text{SI-31})$$

To derive Eq. SI-31, the relation  $\mathbf{r}_{ij} = -\mathbf{r}_{ji}$  and  $r_{ij} = r_{ji}$  are used. Thus there is neither total force nor torque that acts on a molecule for an energy function defined as Eq. SI-28. Hence, ANM has both translational and rotational invariance.

**VI Normal mode refinement study by Kidera et al sheds light on the contributions of internal and external motions to B-factors**

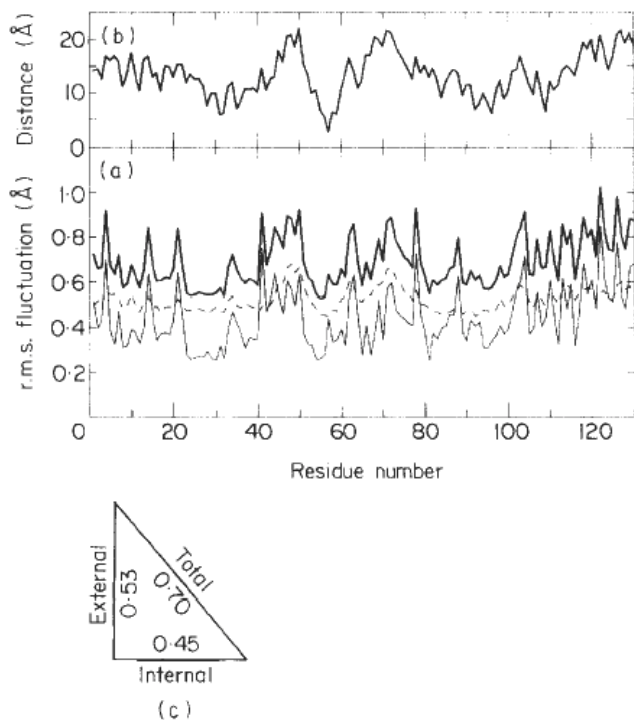

**Figure 1.** (a) r.m.s. fluctuations of non-hydrogen atoms in human lysozyme determined by the normal mode refinement using the model of D100F43E and averaged within each residue. The heavy, broken and thin curves are for the total, external and internal fluctuations, respectively. (b) Distance between centers of gravity of non-hydrogen atoms in the molecules and in each residue. This profile has the following correlation coefficients for the curves in (a): 0.63, 0.81 and 0.51, for the total, external and internal fluctuations, respectively. (c) The average amplitudes of the total, external and internal fluctuations are shown schematically in a right-angled triangle. Squares of the latter 2 equal the square of the former.

**Figure S2** The figure is reproduced from Akinori Kidera, Koji Inaka, Masaaki Matsushima and Nobuhiro Gō (1992) "Normal Mode Refinement: Crystallographic Refinement of Protein Dynamic Structure II. Application to Human Lysozyme" *J. Mol. Biol.* 225, 477-486

The panel (a) of Fig. S2 demonstrates three types of motions – total, internal and external. In this normal mode refinement study, the contribution of internal vibrations to B-factors are modeled by all-atom normal mode analysis (NMA) and contribution of external motions to B-factors are modeled by TLS model (21). Two facts are to be noted here.

First, indeed, external motions have a dominant contribution to the size of the total fluctuation, 0.53/0.70, when internal motions take the share of 0.45/0.70;

Secondly, despite of larger contribution of external motions in its size, *the shape of the profile of the total fluctuation are dominantly determined by that of internal motions.*

External motions on the other hand have a relatively flat profile (featureless). Abscissa is the residue index; Ordinate is the r.m.s fluctuation (Å). We know that B-factors are the size of atom fluctuations (the total fluctuations) multiplied by a constant. We also know that the fluctuation profiles of residue internal motions can be predicted by ANM and EPIRM. Pearson correlation between these two profiles (B-factors and internal motions) indicates given models' applicability to describe B-factors. It is mathematically trivial but worth noting – the correlation coefficient does not change with the absolute size of the two profiles. The correlation is high as long as the shapes of the two profiles are similar. This mathematical judgment has been used in most of (if not all) the published studies.

## VII Further remarks on EPIRM

### *Understand the difference between ANM modes and eGNM modes*

Derived from a potential that is translation/rotation invariant, ANM modes contain no contributions to the translational momentum and angular momentum of the system. Take a tripeptide system for example (Fig S3). A given ANM internal mode  $\mathbf{U}_A$  has nine components in the Cartesian coordinate and  $\mathbf{U}_A = [\mathbf{V}_1^T \ \mathbf{V}_2^T \ \mathbf{V}_3^T]^T$ ; Each  $\mathbf{V}_k$  is a 3-d column vector indicating the size and directions of one residue of the three; 'T' is transpose. Let us assume the simplest case where the mass center of the system does not move and the system does not rotate (however the following discussions also hold for systems translate in constant velocity and/or rotate in constant speed). The following two conditions have to be held.

$$(1) \sum_{k=1}^3 m_k \mathbf{V}_k / \sum_{k=1}^3 m_k = 0, \text{ } m_k \text{ is the mass of residue } k. \text{ Let us assume equal mass for the residues}$$

such that  $m_1 = m_2 = m_3 = m$

$$(2) \mathbf{L} = \sum_{k=1}^3 \mathbf{r}_k \times m \mathbf{V}_k = 0; \text{ } \mathbf{r}_k \text{ is the position vectors for residue } k; \text{ '}\times\text{' is the cross product.}$$



Rigorously speaking, every  $\mathbf{V}_k$  in the aforementioned conditions should be replaced by  $c\mathbf{V}_k/\alpha$  where  $c=(k_B T/\gamma)^{1/2}$  and  $\alpha=2\pi(1/\gamma\lambda_k)^{1/2}$  in order to have  $\mathbf{V}_k$  in the unit of velocity; otherwise  $\mathbf{V}_k$  is dimensionless.

Every ANM internal mode fulfills these two conditions; On the other hand, non-trivial eGNM modes (led by nonzero eigenvalues) fulfill the first condition but not the second.

### ***How is a EPIRM mode derived from a eGNM mode?***

This nonzero L is also known equal to  $\mathbf{I}\boldsymbol{\omega}$ .  $\mathbf{I}$  is the  $3\times 3$  moment of inertia tensor.

$$\mathbf{I} = \begin{bmatrix} I_{xx} & I_{xy} & I_{xz} \\ I_{yx} & I_{yy} & I_{yz} \\ I_{zx} & I_{zy} & I_{zz} \end{bmatrix} \quad \text{where} \quad I_{xx} = \sum_{k=1}^3 m_k (y_k^2 + z_k^2); \quad I_{yy} = \sum_{k=1}^3 m_k (x_k^2 + z_k^2); \quad I_{zz} = \sum_{k=1}^3 m_k (x_k^2 + y_k^2);$$

$$I_{xy} = I_{yx} = -\sum_{k=1}^3 m_k x_k y_k; \quad I_{yz} = I_{zy} = -\sum_{k=1}^3 m_k y_k z_k; \quad I_{xz} = I_{zx} = -\sum_{k=1}^3 m_k x_k z_k$$

The angular velocity can be calculated as  $\boldsymbol{\omega} = \mathbf{I}^{-1}\mathbf{L}$ ; the direction of vector  $\boldsymbol{\omega}$  points to the axis that the whole system rotates about. As a result, one way to remove such rigid rotation is to remove the contribution to this rotation from each residue. In another word, we should remove the component in  $\mathbf{V}_k$  that directly contributes to  $\boldsymbol{\omega}$ . This contribution is known to be  $\boldsymbol{\omega} \times \mathbf{r}_k$ . Hence,  $\mathbf{V}_k - \boldsymbol{\omega} \times \mathbf{r}_k$  would result in a new vector  $\mathbf{V}_k'$  that does not contribute to the rigid-body rotation. Reassembling the  $\mathbf{V}_k'$  ( $k=1..3$ ) returns us the EPIRM mode.

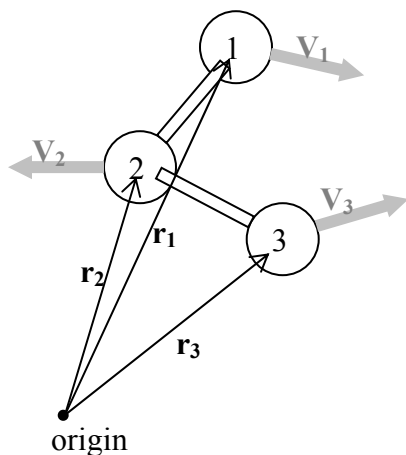

**Figure S3** A tripeptide system motions described by a given normal mode

## VIII ANISOTROPY predictions by EPIRM and ANM

In high-resolution PDB structure files, there are 6 anisotropic displacement parameters (ADPs) associated with each atom. These ADPs are three diagonal and three off-diagonal elements of a  $3 \times 3$  covariance matrix  $\mathbf{U}$  associated with the Gaussian probability distribution of atomic fluctuations in space (14).

The symmetric matrix  $\mathbf{U}_i$  for atom  $i = \begin{bmatrix} U_{i,xx} & U_{i,xy} & U_{i,xz} \\ U_{i,yx} & U_{i,yy} & U_{i,yz} \\ U_{i,zx} & U_{i,yz} & U_{i,zz} \end{bmatrix}$  where  $U_{xx}$ ,  $U_{yy}$  and  $U_{zz}$  are the ADPs

forming the diagonal elements while  $U_{xy}$ ,  $U_{yz}$  and  $U_{zx}$  form the off-diagonal elements of  $\mathbf{U}_i$ .

Diagonalizing  $\mathbf{U}_i$  renders three eigenvectors and three eigenvalues. The eigenvectors give three principal axes of an ellipsoid and the eigenvalues give the spread of the ellipsoid on these axes. ISOTROPY is defined as the minimal eigenvalue divided by the maximal eigenvalue. A unity value would mean perfect isotropic fluctuations while values close to zero suggest highly anisotropic fluctuations of the atom.

ADP-derived ISOTROPY for all the  $C_\alpha$  atoms in the proteins listed in Table S1 are computed and compared with the ISOTROPY derived from the covariance matrices of EPIRM (Eq. 4) and ANM (Eq. SI-18) for the same  $C_\alpha$  atoms. We find an average correlation of  $0.3144 \pm 0.031$  between experiment and EPIRM, and that of  $0.3306 \pm 0.028$  between experiment and ANM. The two correlations are statistically identical. The low correlations are consistent with our previous finding (14).

Care should be taken that even perfect predictions for ISOTROPY do not necessarily suggest any good prediction for directionalities and sizes of atom fluctuations. This is self-evident from the definition of ISOTROPY.

GNM is an isotropic model and ANM is anisotropic. One may intuitively think that ANM would perform less well than GNM in predicting atom dynamics that are highly isotropic. We examine such intuition using the protein set in Table S1. We define an AVERAGE ISOTROPY for a protein which is the average of the ISOTROPY values of all the  $C_\alpha$ s in that protein. On the other hand, the correlation between B-factors and ANM/GNM predictions for this protein is calculated. We plot the quantity (AVERAGE ISOTROPY, correlation) for each of the proteins in the figure below (**Fig S4**).

The result shows both GNM and ANM better predict B-factors when proteins have higher dynamics isotropy (**Fig S4**). The ISOTROPY-dependent correlation increase demonstrates a 0.41 correlation for both GNM and ANM (**Fig S4**). This slightly counter-intuitive result indicates that ENMs generally better predicts isotropic data (e.g. sizes of the fluctuations) than anisotropic data (e.g. directions of the fluctuations) despite of their inherited assumptions, namely, isotropic or anisotropic. This is also noted by other studies (13, 14, 16).

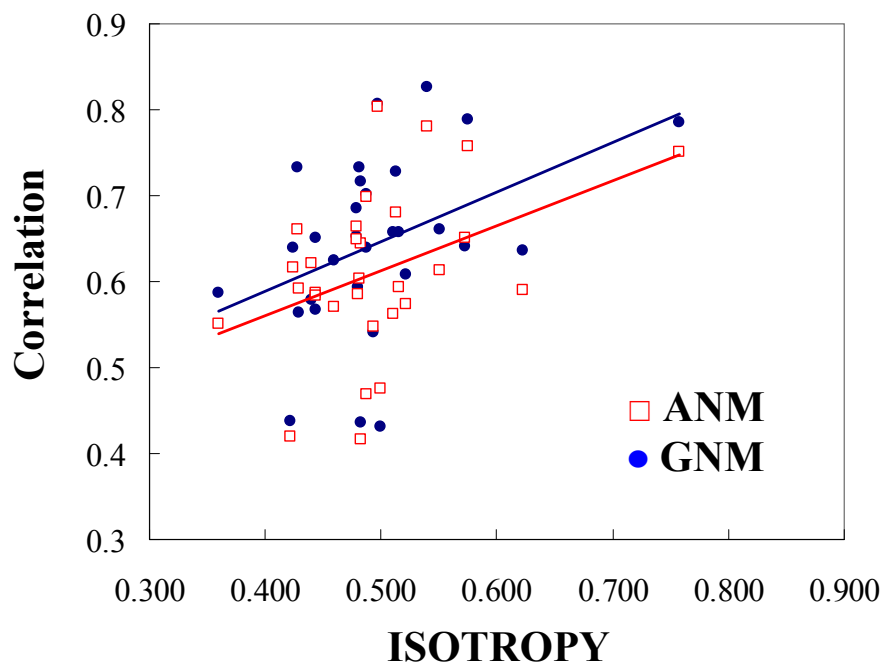

**Figure S4** B-factor predictability (Correlation) versus dynamics ISOTROPY plotted for 30 high-resolution structures

## IX Catalytic residues of Ricin Hydrolase distributed near the (external) rotation axes identified from the first two eGNM modes

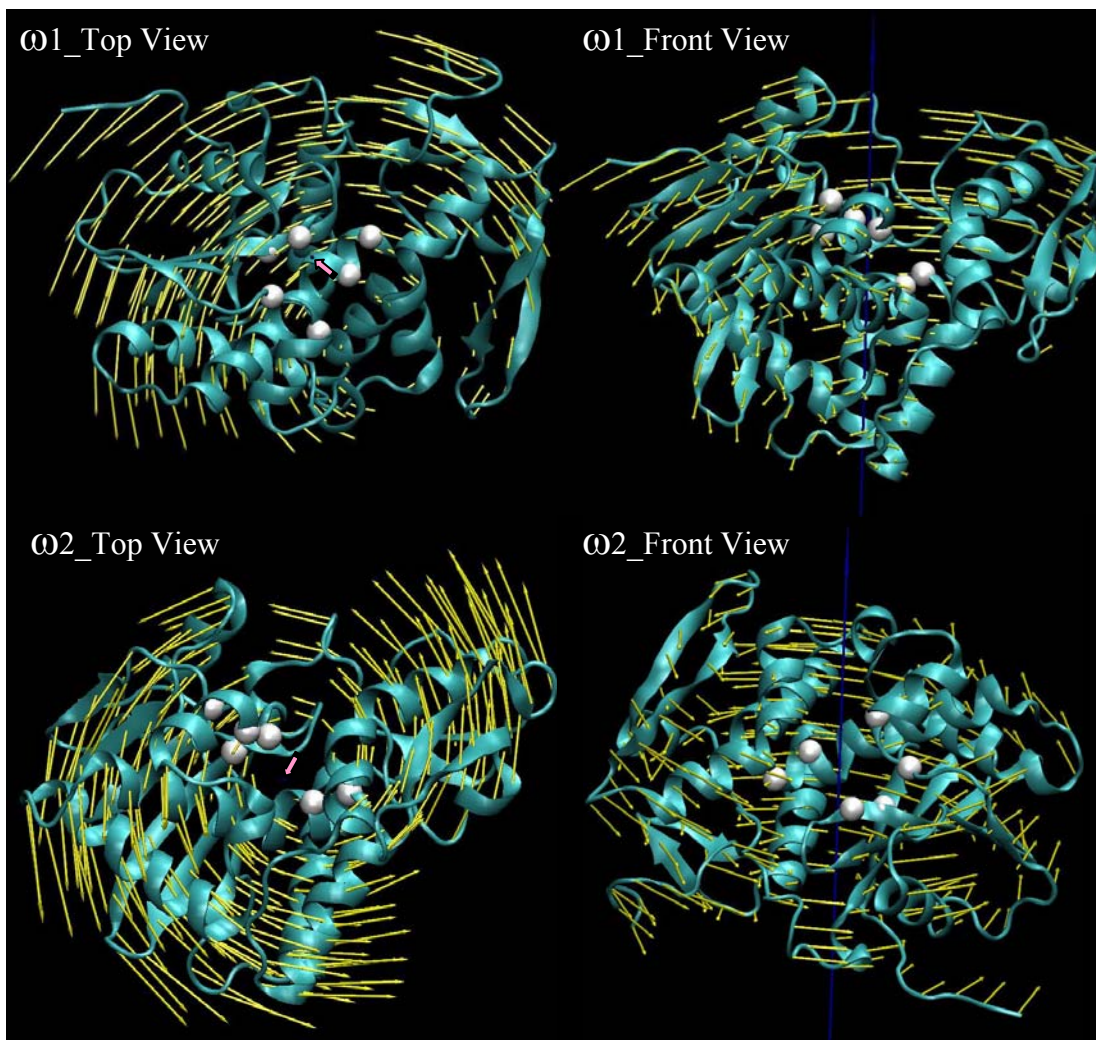

**Figure S5** Distribution of catalytic residues of Ricin Hydrolase near the rotation axes  $\omega_1$  and  $\omega_2$  are the angular velocity vectors indicating the size and direction of the external rotation contaminated in the eGNM mode 1 and 2, respectively. The blue arrows, going through the mean locations of the proteins, point toward the directions of  $\omega_1$  and  $\omega_2$ , but their exaggerated sizes do not correspond to the real magnitude of  $\omega_1$  and  $\omega_2$ . The yellow arrow pointing from the  $i$ -th residue indicates the vector  $(1/c)\omega_k \times \mathbf{r}_i$  (see Eq. 6 in the main text;  $k=1$  or  $2$  herein) that is the componential contribution of a certain residue's movement to the rigid-body rotation, or specifically, the  $\omega$ . Note that the length of the arrows are drawn in proportion to the magnitude of  $(1/c)\omega_k \times \mathbf{r}$  but exaggerated for easy visualization. The  $C_\alpha$  atoms of the catalytic residues Y80, V81, G121, Y123, E177 and R180 are shown in white spheres. In the top views, the small pink arrows indicate the tips of the rotation axes.
